# Supplementary material for: Arabidopsis ICK/KRP cyclin-dependent kinase inhibitors function to ensure the formation of one megaspore mother cell and one functional megaspore per ovule
Source: PLOS journal article supplement (doi:10.1371/journal.pgen.1007230), 2018-03-07
Supplement: S1 (10.1371/journal.pgen.1007230.s001) [file journal.pgen.1007230.s001]

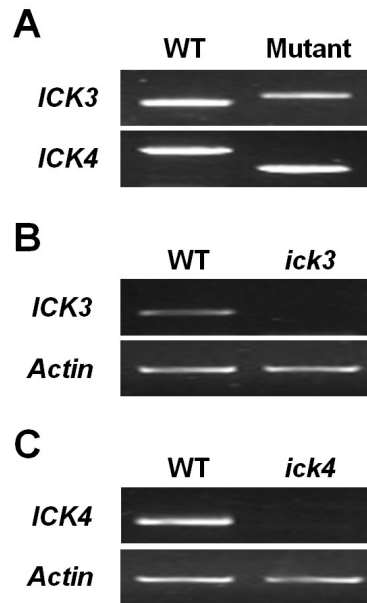

**Figure S1. Genotyping and RT-PCR of *ick3* and *ick4* T-DNA insertion mutants.**

(A) Genotyping of *ick3* (SALK\_053533) and *ick4* (Sail\_548\_B03) single mutants with WT as a control. For both genes, a pair of gene-specific primers was used for amplifying the full-length WT coding sequence of *ICK3* or *ICK4* while a T-DNA left border primer and a gene specific primer were used to amplify a fragment of the T-DNA insert allele.

(B) Analysis of *ICK3* transcript in WT (left lane) and *ick3* single mutant (right lane) by RT-PCR. cDNA synthesized from total RNA and gene-specific primers were used for amplifying the full-length *ICK3* coding sequence (upper row), and the reference *actin* sequence (lower row).

(C) Analysis of *ICK4* transcript in WT (left lane) and *ick4* single mutant (right lane) by RT-PCR. cDNA synthesized from total RNA and gene-specific primers were used for amplifying the full-length *ICK4* coding sequence (upper row), and the reference *actin* sequence (lower row).
