# Supplementary material for: Arabidopsis ICK/KRP cyclin-dependent kinase inhibitors function to ensure the formation of one megaspore mother cell and one functional megaspore per ovule
Source: PLOS journal article supplement (doi:10.1371/journal.pgen.1007230), 2018-03-07
Supplement: S2 (10.1371/journal.pgen.1007230.s002) [file journal.pgen.1007230.s002]

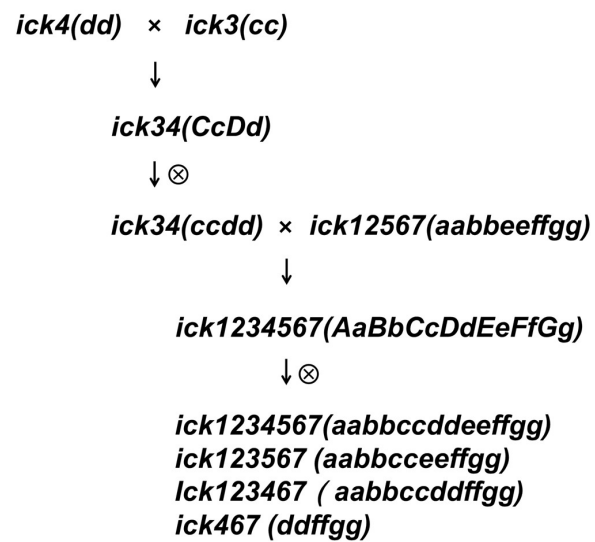

**Figure S2. Crosses used to produce various *ick* mutants from *ICK* single mutants and *ick12567* mutant.**
