# Supplementary material for: Arabidopsis ICK/KRP cyclin-dependent kinase inhibitors function to ensure the formation of one megaspore mother cell and one functional megaspore per ovule
Source: PLOS journal article supplement (doi:10.1371/journal.pgen.1007230), 2018-03-07
Supplement: S3 (10.1371/journal.pgen.1007230.s003) [file journal.pgen.1007230.s003]

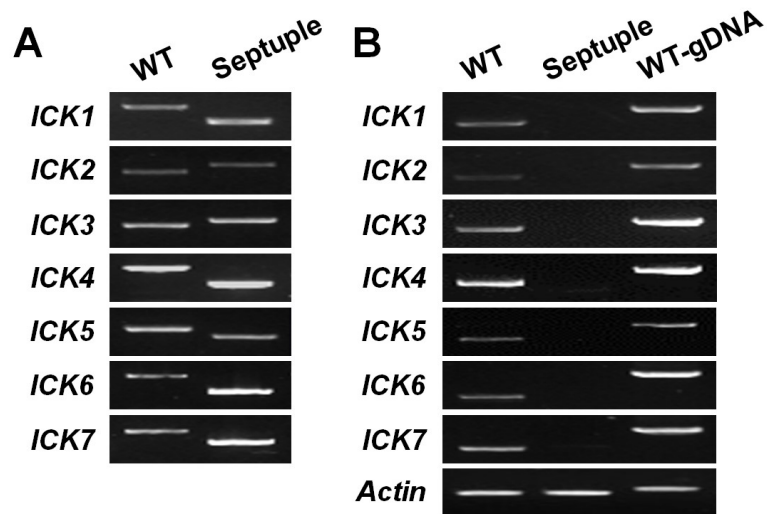

**Figure S3. Genotyping and RT-PCR of *ick* septuple mutant.**

(A) Gene-specific primers for *ICK1*, *ICK2*, *ICK3*, *ICK4*, *ICK5*, *ICK6* and *ICK7* were used to confirm the genotype of *ICK* septuple mutant with WT genomic DNA as a control.

(B) Analysis of *ICK* transcripts in the WT (first lane) and septuple mutant (second lane), with WT genomic DNA as a control (third lane). Gene-specific primers were used for amplifying the full-length sequences of *ICK1* to *ICK7*. *Actin* was used as a control (the last row).
